# Supplementary material for: Wolbachia modifies thermal preference in Drosophila melanogaster
Source: PubMed Central journal article supplement (PMC6766989; doi:10.1111/1462-2920.14347), 2018-10-02
Supplement: EMI-21-3259-s002.pdf [file EMI-21-3259-s002.pdf]

1 **SUPPORTING TABLES and FIGURES**

2

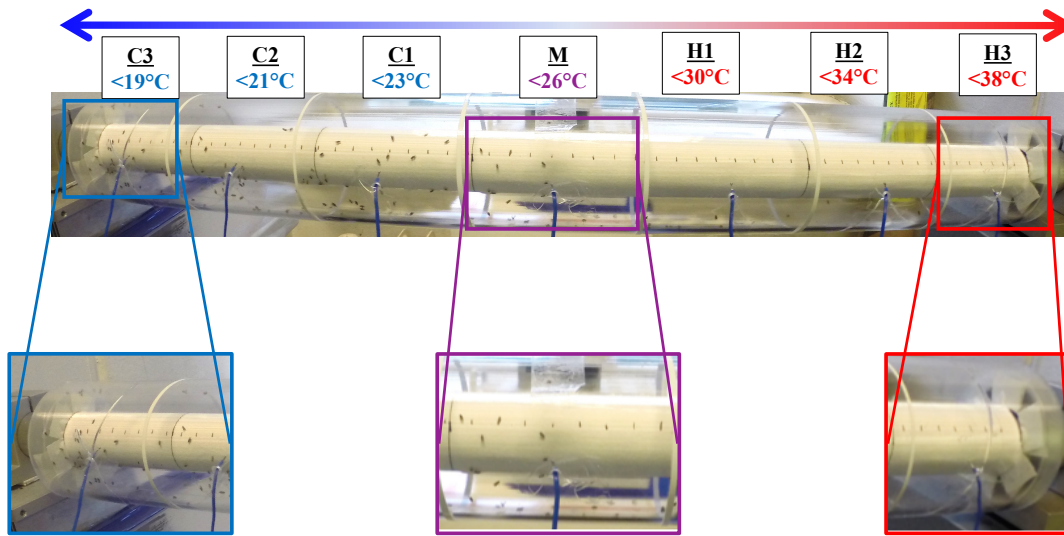

3

4 **Figure S1:** Thermal gradient apparatus gradient depicting different temperature zones and fly  
5 dispersion (wMelPop).

6

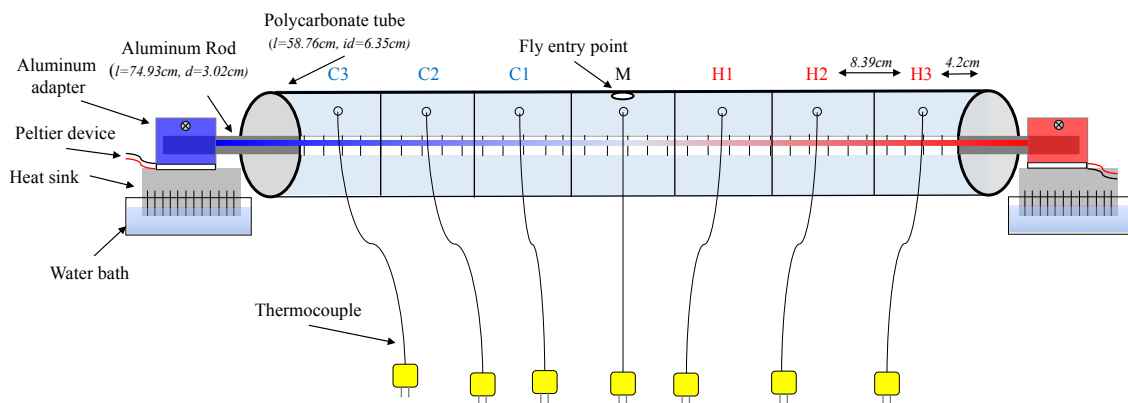

7

8 **Figure S2:** Schematic of the thermal gradient apparatus used for thermal gradient assays as  
9 adapted from Rajpurohit & Schmidt (2016). The polycarbonate tube and length of aluminum  
10 gradient within the tube were 58.76cm and temperature was recorded with K-type  
11 thermocouples.

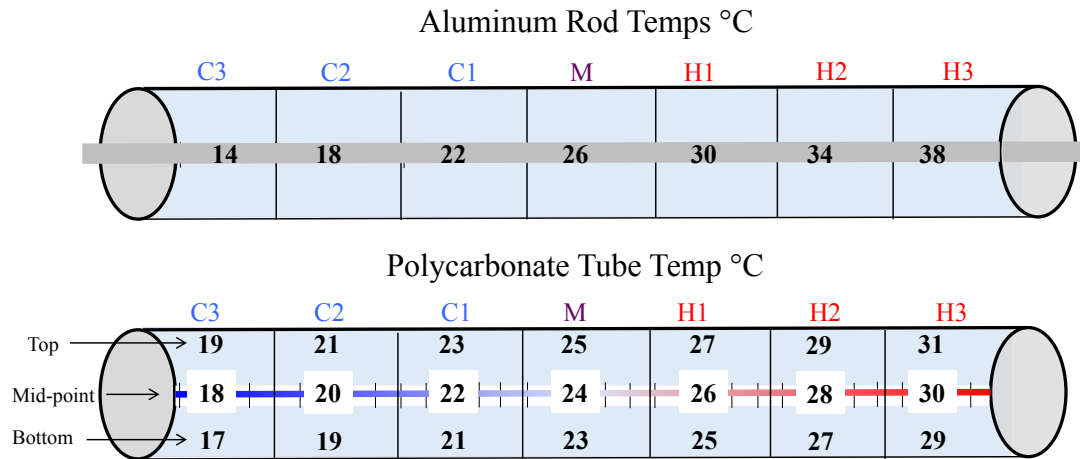

12

13 **Figure S3:** Average + 0.5°C (SD) temperatures from 18 runs that were recorded at each surface  
 14 measured using k-type thermocouples. There was a linear increase in temperature from cold to  
 15 hot as measured at each of seven evenly spaced (8.39cm).

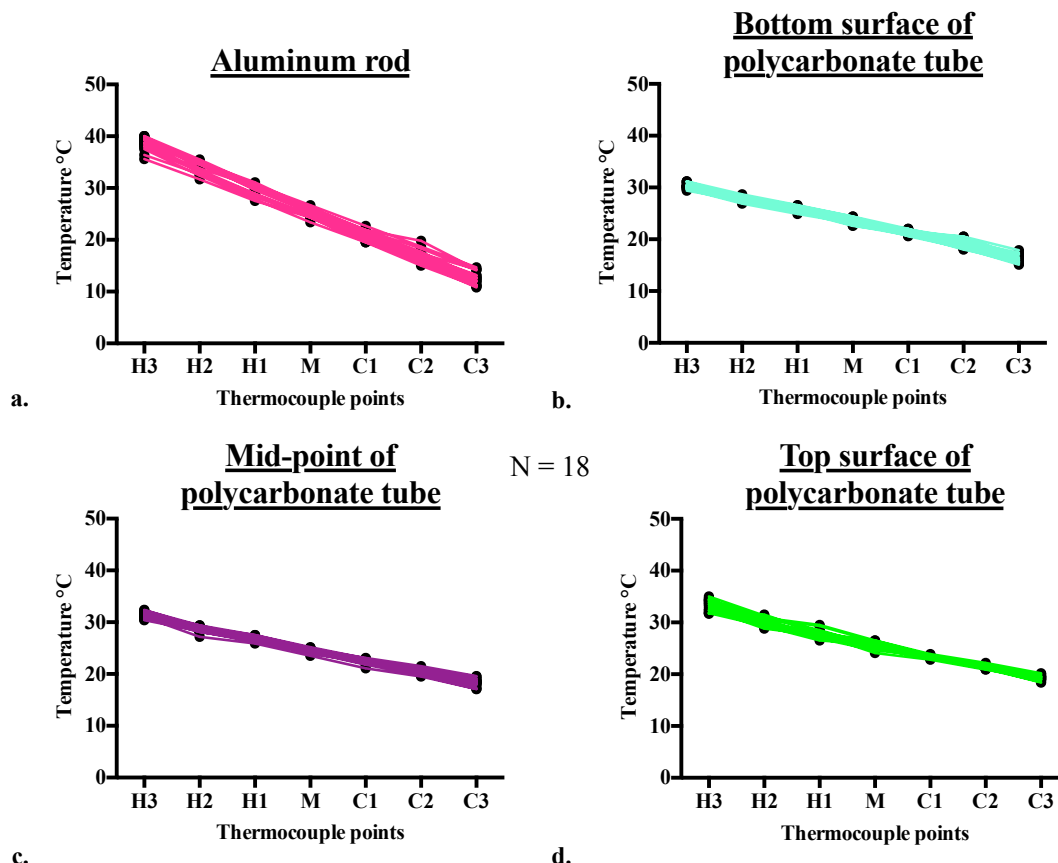

16

17 **Figure S4:** Plots showing linearity of temperature change for the different surfaces (a.  
 18 aluminum rod, b. top, c. bottom, and mid-point of the polycarbonate tube) as measured with K-

19 type thermocouples at regular intervals along the length of apparatus from the hottest end (H3)  
20 to the coldest (C3).

21

22

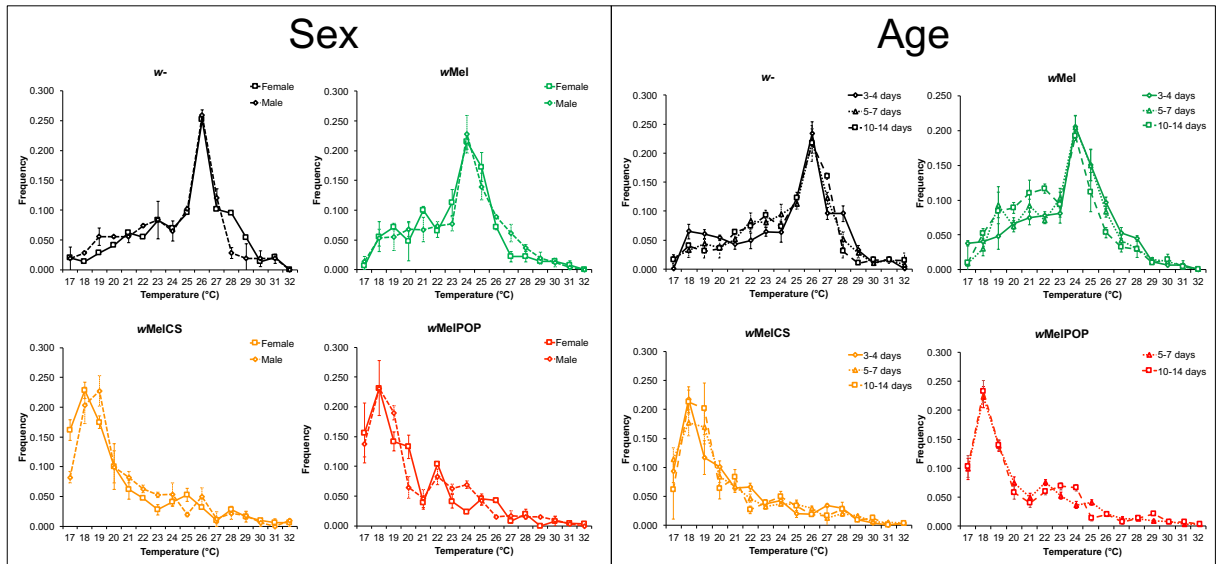

23

24 **Figure S5:** Line plots showing the portion of flies observed at a given frequency for males  
25 and females in the left panel and age classes (*young*: 3-4 days or *old*: 10-14 days post eclosion)  
26 in the right panel. Each of the four subfigures shows the average proportion of flies with respect  
27 to different infection status (uninfected, *wMel*, *wMelCS*, and *wMelPOP*). For *wMelPOP* infected  
28 flies only two age groups were tested. Error bars represent standard errors for average  
29 frequencies at a given temperature across all replicated experiments carried out for a given  
30 infection type and levels of the factors sex or age.

31 **Table S1:** Counts of flies and number of replicates (in parentheses) per sex and age class

| <b>Counts</b>  | <b>Females</b> | <b>Males</b> | <b>Unknown Sex</b> | <b>3-4 days</b> | <b>5-7 days</b> | <b>10-14 days</b> |
|----------------|----------------|--------------|--------------------|-----------------|-----------------|-------------------|
| <b>w-</b>      | 147 (2)        | 108 (1)      | 1032 (10)          | 188 (2)         | 893 (9)         | 206 (2)           |
| <b>wMel</b>    | 140 (2)        | 269 (3)      | 1055 (10)          | 211 (2)         | 986 (10)        | 267 (3)           |
| <b>wMelCS</b>  | 319 (3)        | 211 (2)      | 1089 (10)          | 276 (3)         | 1159 (10)       | 184 (3)           |
| <b>wMelPop</b> | 260 (3)        | 264 (3)      | 823 (8)            | 0 (0)           | 1088 (11)       | 259 (3)           |

32

33

34 **Table S2:** Results of two-way GLMM with independent factors age, *Wolbachia* and the interaction between them (see Table 2 for more detail).

| <b>Model</b>                        | <b>Factor</b>     | <b>n</b>    | <b>Df</b> | <b><math>\chi^2</math></b> | <b>P-value</b>  |
|-------------------------------------|-------------------|-------------|-----------|----------------------------|-----------------|
| <b><i>wol + age + wol x age</i></b> | <b><i>wol</i></b> | <b>5042</b> | <b>6</b>  | <b>149.64</b>              | <b>9.19E-30</b> |
| <i>wol + age + wol x age</i>        | <i>age</i>        | 5042        | 4         | 0.39                       | 0.98            |
| <i>wol + age + wol x age</i>        | <i>wol x age</i>  | 5042        | 3         | 0.17                       | 0.98            |

35

36
